# Supplementary material for: Identification of cancer-driver genes in focal genomic alterations from whole genome sequencing data
Source: Sci Rep. 2016 May 9;6:25582. doi: 10.1038/srep25582 (PMC4860638; doi:10.1038/srep25582)
Supplement: Supplementary Information [file srep25582-s1.pdf]

# Supplementary data: Identification of cancer–driver genes in focal genomic alterations from whole genome sequencing data

Ho Jang, Youngmi Hur and Hyunju Lee

## Supplementary data list

| Data     | Descriptions                                                                                                                                                                                                                       | Pages      |
|----------|------------------------------------------------------------------------------------------------------------------------------------------------------------------------------------------------------------------------------------|------------|
| Table 1  | Manually inspected copy number alteration status harboring known cancer genes from 37 GBM samples                                                                                                                                  | Excel file |
| Table 2  | Manually inspected copy number alteration status harboring known cancer genes from 47 OV samples                                                                                                                                   | Excel file |
| Table 3  | Manually inspected copy number alteration status harboring known cancer genes from 28 LUAD samples                                                                                                                                 | Excel file |
| Table 4  | Manually inspected copy number alteration status harboring known cancer genes from 70 LUAD samples                                                                                                                                 | Excel file |
| Table 5  | Statistically significant clusters identified by the WIFA algorithm with the parameters bin size = 100 base pairs, M = 10, C = 2.0, and d = 0.3 million base pairs and Ensembl gene annotations in the clusters for 37 GBM samples | Excel file |
| Table 6  | The expression-level data for NPAS3 in 37 WGS GBM samples and CDK8 in 28 WGS lung adenocarcinoma samples. In the case of the 37 GBM samples, 29 expression-level data for 37 GBM samples exist                                     | Excel file |
| Table 7  | Comparison of the inspection length of silver standards confirmed by BIC-seq WGS segments in the 37 GBM samples                                                                                                                    | Excel file |
| Table 8  | Ensembl gene annotations of GISTIC 2.0 peaks in the 37 GBM samples                                                                                                                                                                 | Excel file |
| Table 9  | Comparison of the inspection length of silver standards confirmed by BIC-seq WGS segments and TCGA SNP6 segments in 37 GBM samples                                                                                                 | Excel file |
| Table 10 | Statistically significant clusters identified by the WIFA algorithm with the parameters bin size = 100 base pairs, M = 10, C = 2.0, and d = 0.3 million base pairs and Ensembl gene annotations in the clusters for 47 OV samples  | Excel file |
| Table 11 | Ensembl gene annotations of GISTIC 2.0 peaks in the 47 OV samples                                                                                                                                                                  | Excel file |
| Table 12 | Comparison of the inspection length of silver standards confirmed by BIC-seq WGS segments and TCGA SNP6 segments in 47 OV samples                                                                                                  | Excel file |
| Table 13 | Statistically significant clusters identified by the WIFA algorithm with the parameters bin size = 100 base pairs, M = 10, C = 2.0, and d = 0.3 million base pairs and Ensembl gene annotations in the clusters for 28             | Excel file |

|          |                                                                                                                                                                                                                                                    |            |
|----------|----------------------------------------------------------------------------------------------------------------------------------------------------------------------------------------------------------------------------------------------------|------------|
|          | lung adenocarcinoma samples                                                                                                                                                                                                                        |            |
| Table 14 | Ensembl gene annotations of GISTIC 2.0 peaks in the 28 lung adenocarcinoma samples                                                                                                                                                                 | Excel file |
| Table 15 | Comparison of the inspection length of silver standard genes confirmed by both BIC-seq WGS segments and TCGA SNP6 segments in 28 lung adenocarcinoma samples                                                                                       | Excel file |
| Table 16 | Statistically significant clusters identified by the WIFA algorithm with the parameters bin size = 100 base pairs, M = 10, C = 2.0, and d = 0.3 million base pairs and Ensembl gene annotations in the clusters for 70 lung adenocarcinoma samples | Excel file |
| Table 17 | Gene set enrichment test of GO biological process terms and inclusion status of COSMIC Cancer Gene Census genes                                                                                                                                    | Excel file |
| Figure 1 | The flowchart for generating $y^*_{\text{HIGH}}$ for individual samples                                                                                                                                                                            | 4          |
| Figure 2 | The cost of silverstandard discovery in terms of gene inspection within WIFA-Seq clusters or GISTIC 2.0 alteration regions                                                                                                                         | 5          |

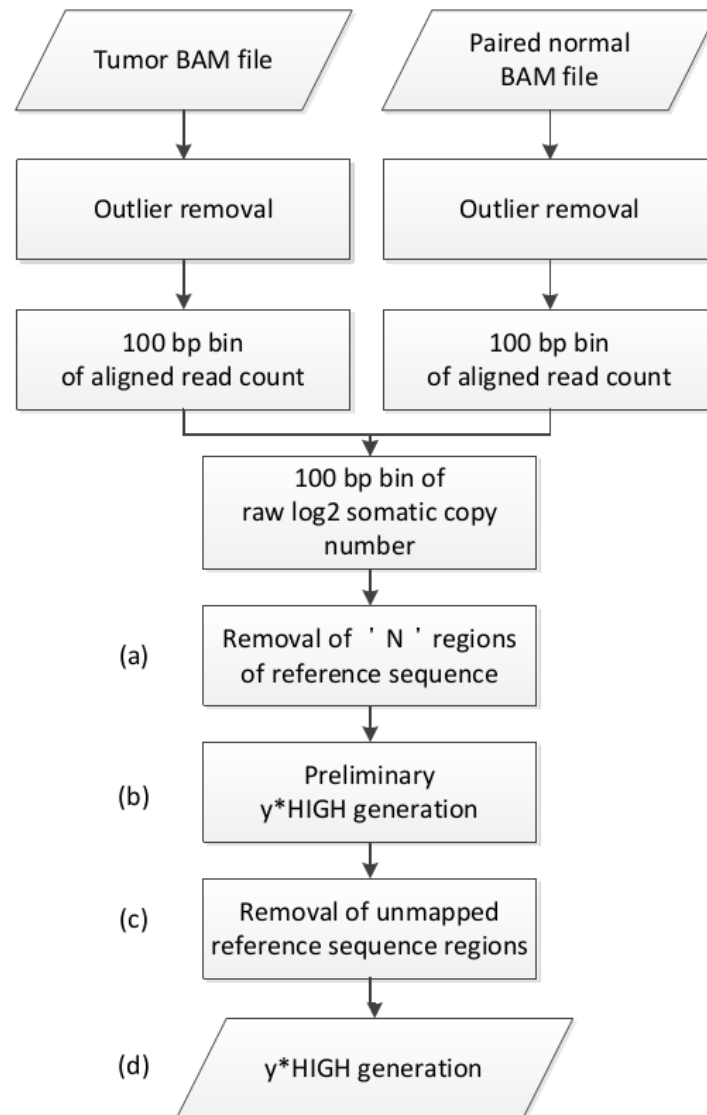

Supplementary Figure 1. The flowchart for generating  $y^*_{\text{HIGH}}$  for individual samples
